# Supplementary material for: Antioxidant Therapy Significantly Attenuates Hepatotoxicity following Low Dose Exposure to Microcystin-LR in a Murine Model of Diet-Induced Non-Alcoholic Fatty Liver Disease
Source: MDPI journal article supplement (doi:10.3390/antiox11081625), 2022-08-22
Supplement: s1 [file s1]

Supplementary material:

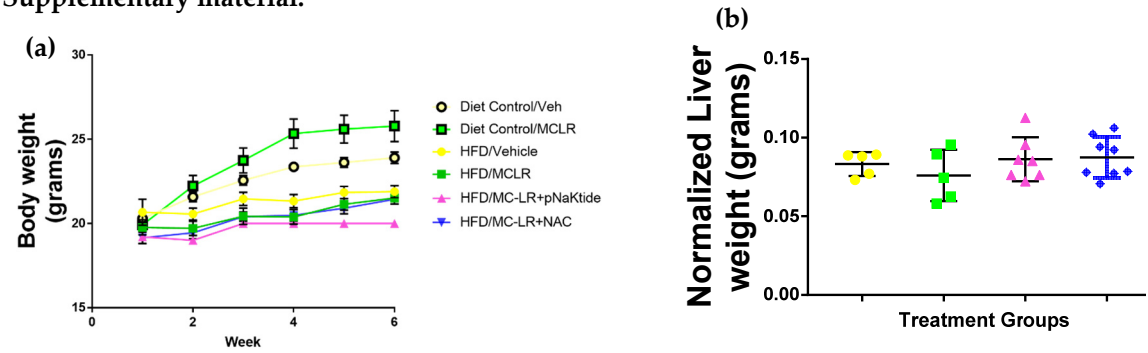

Figure S1: Effect of NAFLD and MC-LR exposure on Body weight and Liver weight. **(a)** Kaplan-Meier analysis of body weights of mice in different groups taken over a period of six weeks revealed that DC mice exposed to the toxin showed an overall increase in body weight as compared to their unexposed counterparts whereas treatment of diet-induced NAFLD mice with pNaKtide after exposure to the toxin showed decrease in body weight as compared to mice that were exposed to the toxin, **(b)** Quantification of liver weights normalized to the body weight did not reveal any significant changes in liver weights of CDHFD-induced NAFLD mice that were exposed to the toxin or those that were treated with antioxidants after exposure to the toxin.

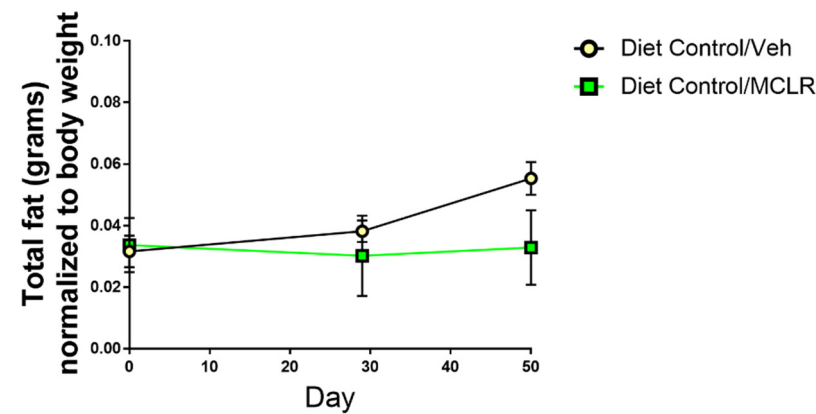

Figure S2: Effect of MC-LR exposure on total body fat in healthy mice. NMR spectroscopy-based analysis revealed no significant alterations in the total body fat content of mice that were exposed to MC-LR.

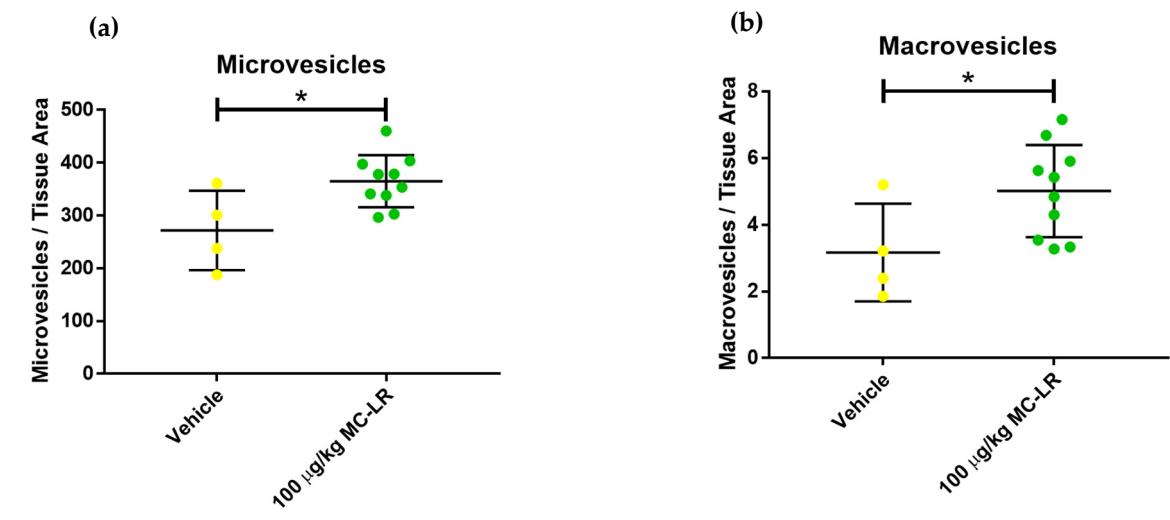

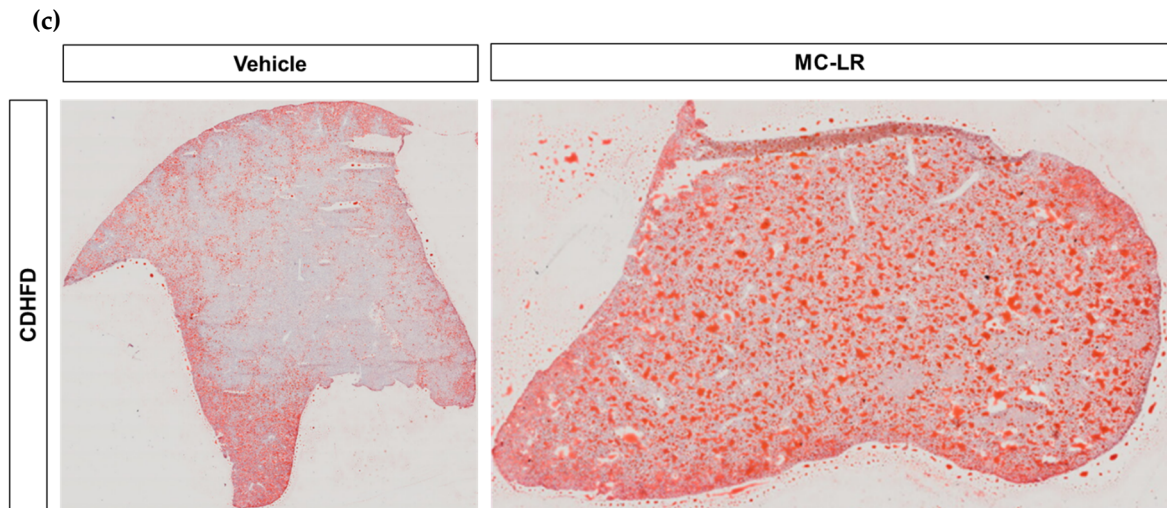

**Figure S3:** MC-LR exposure significantly increases lipid accumulation in livers of diet-induced NAFLD mice. Histological analysis of livers obtained from diet induced NAFLD mice with or without exposure to the toxin revealed that exposure to even low doses of MC-LR (100  $\mu\text{g/kg}$ ) significantly increases lipid accumulation in the form of microvesicles (**a**) and macrovesicles (**b**) within the hepatocytes. (**c**) Representative images of liver tissues stained with Oil Red O stain. The red dye stains the lipid moieties within the tissues. \*  $p \leq 0.05$ .

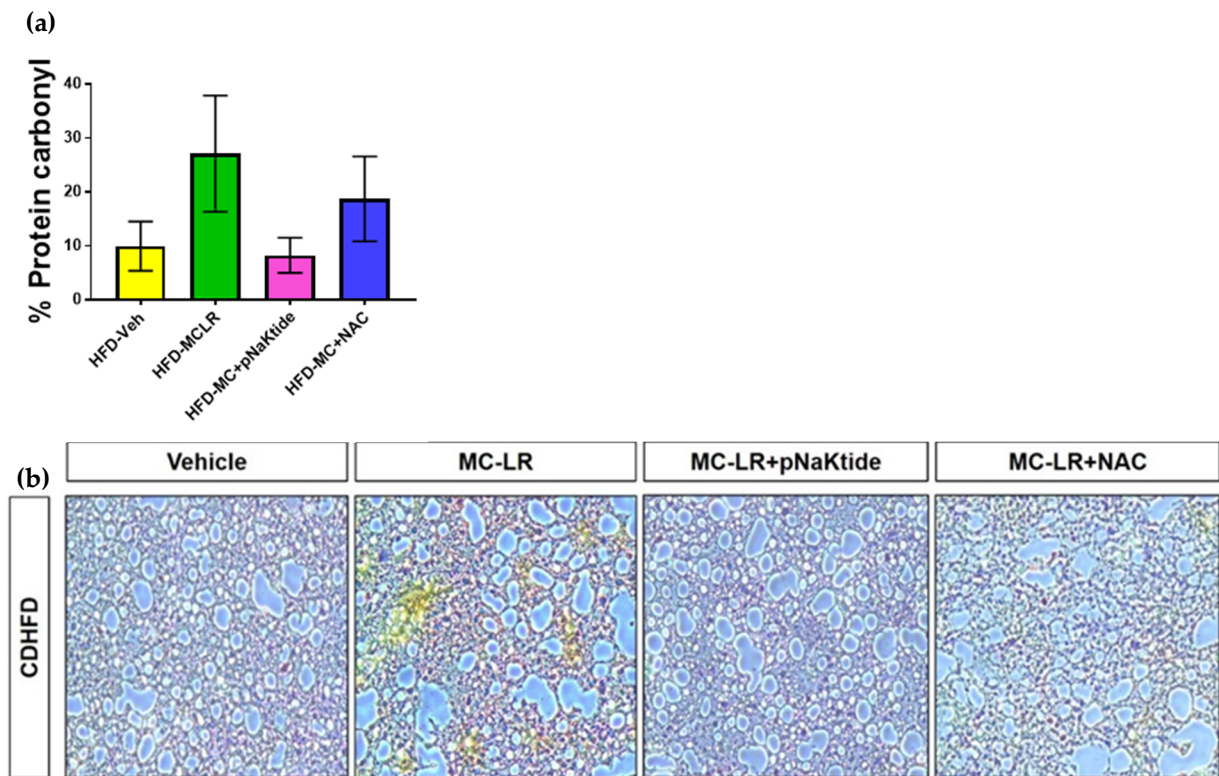

**Figure S4:** Reduction in protein carbonyl fragments, a marker of oxidative stress, after antioxidant treatment. **(a)** Protein carbonyl levels in liver (n=3) were elevated on exposure to MC-LR and reduced after treatment with antioxidants; **(b)** Representative images of the liver sections stained for assessing the protein carbonyl content.

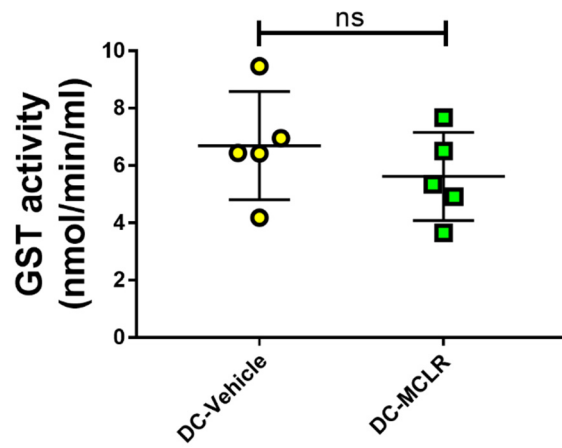

Figure S5: Effect of MC-LR exposure on Glutathione-S-transferase (GST) activity. GST activity was not significantly altered in healthy mice exposed to low doses of MC-LR.

**Table S1:** Genetic analysis of drug transporters as well as Phase I & II metabolic enzymes in livers from CDHFD-induced NAFLD mice. qPCR arrays were run with liver cDNA from NAFLD mice. Qiagen software was used to run the analysis for different groups. Genes colored in Red were significantly upregulated while those in Blue were significantly downregulated in their respective comparison groups. All of the data presented is significant. ( $p \leq 0.05$ ).

|                                      | Effect of MCLR in HFD mice | Effect of antioxidants      |                        | Effect of CDHFD                                      | Effect of MCLR in healthy mice | Effect of Antioxidants alone on HFD |                           |
|--------------------------------------|----------------------------|-----------------------------|------------------------|------------------------------------------------------|--------------------------------|-------------------------------------|---------------------------|
| <u>Drug Transporters</u>             | HFD-Vehicle vs MCLR        | HFD-MCLR vs MCLR + pNaKtide | HFD-MCLR vs MCLR + NAC | DC-Veh vs HFD-Veh                                    | DC-Veh vs Treated              | HFD-Veh vs pNaKtide                 | HFD-Veh vs NAC            |
| <u>Metallothioneins:</u>             | Mt2                        |                             |                        | Mt3,                                                 |                                |                                     |                           |
| <u>P-Glycoprotein Family Members</u> | Abcb1a                     | Abcb1a                      | Gpi1                   | Abcc1, Gpi                                           |                                |                                     | Abcb1a,                   |
| <u>Phase I Metabolizing Enzymes</u>  | Cyp3a11                    | Cyp3a11                     | Cyp11b2, Cyp3a11       | Cyp17a1, Cyp1a2, Cyp4b1, Cyp2c29, Cyp2e1             |                                |                                     | Cyp2c29, Cyp2e1, Cyp3a11, |
| <u>Phase II Metabolizing Enzymes</u> |                            |                             |                        |                                                      |                                |                                     |                           |
| <u>Carboxylesterases</u>             |                            |                             |                        | Ces1g, Ces2c                                         |                                |                                     |                           |
| <u>Decarboxylases</u>                |                            | Gad1                        | Gad1                   | Gad1                                                 |                                |                                     |                           |
| <u>Dehydrogenases</u>                |                            |                             |                        | Adh1, Adh5                                           |                                | Hsd17b2,                            | Adh5, Hsd17b2,            |
| <u>Glutathione Peroxidases</u>       |                            | Gsta3, Gstm2                | Gsta1, Gsta4           | Gsta1, Gsta3, Mgst1, Gstm3, Gpx 2, Gpx3, Gstz1, Mpo, | Gpx2, Gstz1, Mpo,              |                                     | Mpo,                      |

|                                            |           |                 |       |                                                |       |      |               |
|--------------------------------------------|-----------|-----------------|-------|------------------------------------------------|-------|------|---------------|
| <u>Hydrolases</u>                          |           |                 |       | Ephx1,<br>Ephx2,<br>Faah, Fbp1                 |       |      |               |
| <u>Kinases</u>                             | Pklr, Pkm | Pklr, Pkm       |       | Hk2, Pklr,<br>Pkm                              |       |      |               |
| <u>Lipoxygenases</u>                       |           |                 |       | Alox12,<br>Apoe                                |       |      |               |
| <u>Oxidoreductases</u>                     | Blvra     | Srd5a1          |       | Aoc1,<br>Cyb5r3,<br>Srd5a1,<br>Blvra,<br>Nos3, | Mthfr | Nos3 | Blvra,        |
| <u>Paraoxonases</u>                        |           |                 |       | Pon1                                           |       |      |               |
| <u>Glutathione S-Transferases</u>          |           | Gsta3,<br>Gstm2 | Mgst3 | Gstm3,<br>Gstt1                                |       |      | Gstt1,        |
| <u>Other Phase II Metabolizing Enzymes</u> |           |                 |       | Nat1,<br>Comt,<br>Nat2, Ggt1                   |       |      |               |
| <u>Other Drug Metabolism Genes</u>         |           |                 |       | Gckr, Snn,<br>Arnt                             |       |      | Ahr,<br>Gckr, |

**Table S2:** Quantitative PCR analysis of the genetic expression of transporters and enzymes involved in Phase I & II drug metabolism. qPCR arrays were run with cDNA extracted from the livers of CDHFD diet-induced NAFLD mice exposed to low doses of MC-LR and/or treated with targeted antioxidants such as pNaKTide or NAC. Qiagen software was used to run the analysis for different groups. Numbers in bold indicate significant fold regulation with p value  $\leq 0.05$ .

| Gene                                                           | Symbol  | HFD Veh vs HFD MCLR |                 | HFD MCLR vs HFD MCLR+pNaKTide |                 | HFD MCLR vs HFD MCLR+NAC |          | DC Veh vs DC MCLR |          |
|----------------------------------------------------------------|---------|---------------------|-----------------|-------------------------------|-----------------|--------------------------|----------|-------------------|----------|
|                                                                |         | Fold Regulation     | p value         | Fold Regulation               | p value         | Fold Regulation          | p value  | Fold Regulation   | p value  |
| ATP-binding cassette, sub-family B (MDR/TAP), member 1A        | Abcb1a  | <b>2.48</b>         | <b>0.014206</b> | <b>-1.82</b>                  | <b>0.031181</b> | -1.00                    | 0.831654 | -1.08             | 0.907460 |
| ATP-binding cassette, sub-family B (MDR/TAP), member 1B        | Abcb1b  | 1.18                | 0.492898        | 1.81                          | 0.413107        | 1.28                     | 0.523265 | 1.13              | 0.756136 |
| ATP-binding cassette, sub-family B (MDR/TAP), member 4         | Abcb4   | 1.00                | 0.886174        | 1.14                          | 0.537746        | -1.22                    | 0.724269 | 1.12              | 0.571156 |
| ATP-binding cassette, sub-family C (CFTR/MRP), member 1        | Abcc1   | 1.22                | 0.363985        | -1.53                         | 0.067772        | -1.20                    | 0.278031 | -1.02             | 0.799711 |
| Amiloride binding protein 1 (amine oxidase, copper-containing) | Aoc1    | 1.91                | 0.242431        | -4.71                         | 0.157960        | -1.60                    | 0.390835 | -1.94             | 0.780766 |
| Alcohol dehydrogenase 1 (class I)                              | Adh1    | 157.22              | 0.430152        | 1.21                          | 0.388849        | 1.19                     | 0.463936 | -1.03             | 0.788510 |
| Alcohol dehydrogenase 4 (class II), pi polypeptide             | Adh4    | -1.19               | 0.603176        | 1.30                          | 0.506204        | -1.24                    | 0.678062 | 1.06              | 0.768761 |
| Alcohol dehydrogenase 5 (class III), chi polypeptide           | Adh5    | -1.04               | 0.992845        | 1.17                          | 0.653452        | -1.12                    | 0.633176 | 1.01              | 0.966724 |
| Aryl-hydrocarbon receptor                                      | Ahr     | 1.21                | 0.221962        | -1.03                         | 0.808825        | -1.03                    | 0.956932 | -1.06             | 0.569601 |
| Aminolevulinate, delta-, dehydratase                           | Alad    | 1.09                | 0.532074        | 1.01                          | 0.988952        | -1.06                    | 0.983574 | -1.07             | 0.734400 |
| Aldehyde dehydrogenase family 1, subfamily A1                  | Aldh1a1 | 1.06                | 0.734233        | 1.12                          | 0.910483        | -1.19                    | 0.844142 | 1.10              | 0.513299 |
| Arachidonate 12-lipoxygenase                                   | Alox12  | 1.21                | 0.488114        | -1.33                         | 0.273823        | 1.11                     | 0.775093 | -1.00             | 0.993343 |
| Arachidonate 15-lipoxygenase                                   | Alox15  | 2.21                | 0.052269        | -1.82                         | 0.197424        | 1.36                     | 0.451231 | -4.84             | 0.377940 |
| Arachidonate 5-lipoxygenase                                    | Alox5   | -1.03               | 0.819576        | -1.15                         | 0.560789        | 1.07                     | 0.992981 | -1.06             | 0.788743 |
| Apolipoprotein E                                               | Apoe    | -1.06               | 0.722594        | -1.17                         | 0.529972        | 1.04                     | 0.764989 | 1.04              | 0.670949 |
| Aryl hydrocarbon receptor nuclear translocator                 | Arnt    | -1.19               | 0.273490        | -1.23                         | 0.153904        | 1.04                     | 0.818846 | -1.11             | 0.650074 |
| ArsA arsenite transporter, ATP-                                | Asna1   | -1.05               | 0.769962        | 1.31                          | 0.271494        | 1.33                     | 0.284325 | 1.04              | 0.867214 |

|                                                         |         |             |                 |              |                 |               |                 |       |          |
|---------------------------------------------------------|---------|-------------|-----------------|--------------|-----------------|---------------|-----------------|-------|----------|
| binding, homolog 1<br>(bacterial)                       |         |             |                 |              |                 |               |                 |       |          |
| Biliverdin reductase A                                  | Blvra   | <b>1.42</b> | <b>0.044023</b> | -1.34        | 0.071539        | -1.07         | 0.657063        | 1.05  | 0.655463 |
| Biliverdin reductase B (flavin reductase (NADPH))       | Blvrb   | -1.24       | 0.386546        | -1.05        | 0.697979        | 1.08          | 0.636054        | 1.11  | 0.156048 |
| Carboxylesterase 1G                                     | Ces1g   | 1.11        | 0.617846        | -1.48        | 0.263278        | -1.22         | 0.632263        | -1.25 | 0.170421 |
| Carboxylesterase 2C                                     | Ces2c   | -1.15       | 0.465117        | -1.12        | 0.560884        | 1.02          | 0.871061        | -1.05 | 0.765885 |
| Carbohydrate (keratan sulfate Gal-6) sulfotransferase 1 | Chst1   | -1.19       | 0.774899        | -1.58        | 0.541198        | 1.22          | 0.611973        | -3.31 | 0.385967 |
| Catechol-O-methyltransferase                            | Comt    | -1.20       | 0.526019        | 1.01         | 0.994706        | -1.20         | 0.491019        | -1.16 | 0.506225 |
| Cytochrome b5 reductase 3                               | Cyb5r3  | -1.36       | 0.147156        | 1.08         | 0.519303        | 1.10          | 0.498396        | 1.17  | 0.292910 |
| Cytochrome P450, family 11, subfamily b, polypeptide 2  | Cyp11b2 | -2.35       | 0.373919        | 7.59         | 0.356331        | <b>-42.44</b> | <b>0.037352</b> | 1.05  | 0.659356 |
| Cytochrome P450, family 17, subfamily a, polypeptide 1  | Cyp17a1 | 1.61        | 0.304172        | 1.32         | 0.435738        | 1.32          | 0.445055        | 1.09  | 0.855740 |
| Cytochrome P450, family 19, subfamily a, polypeptide 1  | Cyp19a1 | -117.78     | 0.373901        | 204.70       | 0.373869        | -1.64         | 0.507106        | -2.08 | 0.404924 |
| Cytochrome P450, family 1, subfamily a, polypeptide 1   | Cyp1a1  | 1.55        | 0.201927        | 1.02         | 0.908263        | -1.03         | 0.904137        | -1.20 | 0.525868 |
| Cytochrome P450, family 1, subfamily a, polypeptide 2   | Cyp1a2  | -1.43       | 0.471695        | -1.05        | 0.835581        | -1.37         | 0.562969        | -1.15 | 0.620745 |
| Cytochrome P450, family 27, subfamily b, polypeptide 1  | Cyp27b1 | -1.27       | 0.845770        | 2.44         | 0.393394        | 1.74          | 0.736693        | 7.81  | 0.372150 |
| Cytochrome P450, family 2, subfamily c, polypeptide 29  | Cyp2c29 | -1.10       | 0.992385        | 1.08         | 0.900408        | -1.20         | 0.531840        | 1.03  | 0.881156 |
| Cytochrome P450, family 2, subfamily e, polypeptide 1   | Cyp2e1  | -1.16       | 0.716623        | 1.17         | 0.669033        | 1.03          | 0.965291        | 1.08  | 0.540927 |
| Cytochrome P450, family 3, subfamily a, polypeptide 11  | Cyp3a11 | <b>1.25</b> | <b>0.047157</b> | <b>-1.78</b> | <b>0.006452</b> | <b>-1.82</b>  | <b>0.004951</b> | 1.27  | 0.077798 |
| Cytochrome P450, family 3, subfamily a, polypeptide 44  | Cyp3a44 | 2.35        | 0.429428        | -1.70        | 0.643315        | -1.85         | 0.412536        | 1.84  | 0.827338 |
| Cytochrome P450, family 4, subfamily b, polypeptide 1   | Cyp4b1  | 1.04        | 0.741416        | -1.13        | 0.579111        | -1.18         | 0.657484        | -1.35 | 0.226553 |
| Epoxide hydrolase 1, microsomal                         | Ephx1   | 1.11        | 0.444758        | -1.06        | 0.600954        | -1.15         | 0.570089        | -1.14 | 0.345576 |
| Epoxide hydrolase 2, cytoplasmic                        | Ephx2   | -1.04       | 0.819633        | 1.10         | 0.713964        | -1.29         | 0.647432        | 1.04  | 0.799815 |
| Fatty acid amide hydrolase                              | Faah    | 1.03        | 0.918898        | 1.24         | 0.291458        | -1.12         | 0.989865        | -1.02 | 0.860994 |
| Fructose biphosphatase 1                                | Fbp1    | -1.10       | 0.618928        | 1.10         | 0.657683        | 1.04          | 0.832326        | 1.21  | 0.154303 |
| Glutamic acid decarboxylase 1                           | Gad1    | 1.17        | 0.593998        | <b>-1.91</b> | <b>0.044822</b> | <b>-2.55</b>  | <b>0.020720</b> | 5.31  | 0.406839 |
| Glutamic acid decarboxylase 2                           | Gad2    | -634.73     | 0.373900        | 2.61         | 0.389470        | 2.79          | 0.385557        | -2.55 | 0.407364 |
| Glucokinase regulatory protein                          | Gckr    | -1.30       | 0.202515        | 1.39         | 0.135322        | 1.11          | 0.688979        | -1.07 | 0.448434 |



|                                                               |         |              |                 |              |                 |             |                 |              |                 |
|---------------------------------------------------------------|---------|--------------|-----------------|--------------|-----------------|-------------|-----------------|--------------|-----------------|
| Gamma-glutamyltransferase 1                                   | Ggt1    | 2.07         | 0.232062        | -1.44        | 0.456518        | -1.02       | 0.673523        | 2.13         | 0.314229        |
| Glucose phosphate isomerase 1                                 | Gpi1    | 1.17         | 0.154021        | -1.00        | 0.989949        | <b>1.36</b> | <b>0.005406</b> | -1.07        | 0.656969        |
| Glutathione peroxidase 1                                      | Gpx1    | -1.11        | 0.531345        | -1.26        | 0.177474        | -1.40       | 0.462801        | 1.26         | 0.370408        |
| Glutathione peroxidase 2                                      | Gpx2    | 1.27         | 0.468809        | -1.19        | 0.780867        | 2.95        | 0.241352        | <b>-9.43</b> | <b>0.030818</b> |
| Glutathione peroxidase 3                                      | Gpx3    | 1.52         | 0.230003        | 1.16         | 0.870719        | 1.34        | 0.583618        | -1.12        | 0.623949        |
| Glutathione peroxidase 5                                      | Gpx5    | -1.54        | 0.464531        | 1.00         | 0.810715        | 1.39        | 0.649447        | -1.30        | 0.609346        |
| Glutathione reductase                                         | Gsr     | -1.22        | 0.254823        | 1.19         | 0.485369        | -1.02       | 0.945296        | -1.15        | 0.248737        |
| Glutathione S-transferase, alpha 1 (Ya)                       | Gsta1   | -1.06        | 0.731778        | 1.19         | 0.446018        | 1.67        | 0.048433        | -1.22        | 0.447502        |
| Glutathione S-transferase, alpha 3                            | Gsta3   | -1.21        | 0.347458        | <b>1.67</b>  | <b>0.039196</b> | 1.21        | 0.483358        | 1.32         | 0.110856        |
| Glutathione S-transferase, alpha 4                            | Gsta4   | 1.07         | 0.589160        | 1.12         | 0.106586        | <b>1.37</b> | <b>0.025898</b> | 1.10         | 0.613970        |
| Glutathione S-transferase, mu 1                               | Gstm1   | -1.19        | 0.228344        | -1.13        | 0.183472        | -1.05       | 0.810064        | -1.12        | 0.552566        |
| Glutathione S-transferase, mu 2                               | Gstm2   | -1.25        | 0.329110        | <b>-1.50</b> | <b>0.027929</b> | -1.34       | 0.103833        | 1.01         | 0.933402        |
| Glutathione S-transferase, mu 3                               | Gstm3   | -1.60        | 0.125825        | 1.58         | 0.128266        | 1.45        | 0.348207        | -1.53        | 0.082899        |
| Glutathione S-transferase, mu 4                               | Gstm4   | -1.26        | 0.234262        | 1.15         | 0.518866        | -1.04       | 0.856474        | -1.50        | 0.073864        |
| Glutathione S-transferase, mu 5                               | Gstm5   | 1.09         | 0.755035        | -1.12        | 0.477036        | -1.13       | 0.813840        | -1.09        | 0.519257        |
| Glutathione S-transferase, pi 1                               | Gstp1   | 1.40         | 0.749429        | 1.75         | 0.528941        | -1.83       | 0.788107        | 1.54         | 0.612684        |
| Glutathione S-transferase, theta 1                            | Gstt1   | 1.11         | 0.508489        | 1.07         | 0.803736        | 1.02        | 0.885045        | 1.12         | 0.328742        |
| Glutathione transferase zeta 1 (maleylacetoacetate isomerase) | Gstz1   | -1.10        | 0.587817        | 1.10         | 0.625011        | -1.02       | 0.887067        | <b>1.32</b>  | <b>0.043819</b> |
| Hexokinase 2                                                  | Hk2     | 1.65         | 0.127754        | -1.56        | 0.071272        | 1.04        | 0.648627        | 1.27         | 0.180091        |
| Hydroxysteroid (17-beta) dehydrogenase 1                      | Hsd17b1 | -1.16        | 0.754285        | 1.22         | 0.622496        | 1.89        | 0.147718        | 1.45         | 0.272238        |
| Hydroxysteroid (17-beta) dehydrogenase 2                      | Hsd17b2 | -1.45        | 0.129534        | -1.04        | 0.970062        | -1.38       | 0.213061        | 1.05         | 0.917953        |
| Hydroxysteroid (17-beta) dehydrogenase 3                      | Hsd17b3 | -6.60        | 0.440560        | 7.02         | 0.376877        | 1.09        | 0.964794        | -1.26        | 0.760312        |
| Lactoperoxidase                                               | Lpo     | -19.65       | 0.373907        | 19.48        | 0.373918        | 6.53        | 0.295507        | 1.21         | 0.066710        |
| Microsomal glutathione S-transferase 1                        | Mgst1   | -1.30        | 0.103919        | 1.12         | 0.608464        | -1.20       | 0.687807        | 1.07         | 0.628826        |
| Microsomal glutathione S-transferase 2                        | Mgst2   | 2.07         | 0.129061        | -1.04        | 0.755358        | 1.49        | 0.408084        | -1.71        | 0.465444        |
| Microsomal glutathione S-transferase 3                        | Mgst3   | 1.01         | 0.867439        | 1.56         | 0.056947        | 1.82        | 0.020271        | -1.19        | 0.527905        |
| Myeloperoxidase                                               | Mpo     | -1.52        | 0.334174        | -3.26        | 0.133234        | -1.15       | 0.646583        | <b>12.34</b> | <b>0.002661</b> |
| Metallothionein 2                                             | Mt2     | <b>-1.84</b> | <b>0.023053</b> | -1.76        | 0.067216        | -1.17       | 0.465620        | 2.17         | 0.222093        |
| Metallothionein 3                                             | Mt3     | -1.26        | 0.313778        | -1.13        | 0.311319        | 1.64        | 0.075628        | -1.34        | 0.206698        |

|                                                           |          |              |                 |              |                 |       |          |             |                 |
|-----------------------------------------------------------|----------|--------------|-----------------|--------------|-----------------|-------|----------|-------------|-----------------|
| 5,10-methylenetetrahydrofolate reductase                  | Mthfr    | 1.09         | 0.909503        | -1.39        | 0.212194        | -1.57 | 0.121243 | <b>1.42</b> | <b>0.023447</b> |
| N-acetyl transferase 1                                    | Nat1     | -1.20        | 0.734220        | 1.58         | 0.353253        | -1.31 | 0.410224 | 1.32        | 0.255014        |
| N-acetyltransferase 2 (arylamine N-acetyltransferase)     | Nat2     | 1.38         | 0.281654        | 1.20         | 0.499979        | 1.04  | 0.755314 | 1.04        | 0.758156        |
| Nitric oxide synthase 3, endothelial cell                 | Nos3     | 1.34         | 0.165640        | -1.31        | 0.313638        | 1.15  | 0.448792 | 1.18        | 0.418327        |
| NAD(P)H dehydrogenase, quinone 1                          | Nqo1     | 1.08         | 0.768371        | -1.08        | 0.711729        | -1.19 | 0.798861 | 1.36        | 0.467115        |
| Pyruvate kinase liver and red blood cell                  | Pklr     | <b>-1.42</b> | <b>0.019992</b> | <b>1.60</b>  | <b>0.002698</b> | 1.18  | 0.529915 | -1.28       | 0.465194        |
| Pyruvate kinase, muscle                                   | Pkm      | <b>1.63</b>  | <b>0.020729</b> | <b>-1.67</b> | <b>0.024016</b> | 1.04  | 0.750995 | 1.03        | 0.783285        |
| Paraoxonase 1                                             | Pon1     | -1.14        | 0.847598        | 1.34         | 0.489565        | 1.00  | 0.991646 | -1.01       | 0.927892        |
| Paraoxonase 2                                             | Pon2     | -1.20        | 0.367056        | 1.08         | 0.478359        | 1.08  | 0.570160 | 1.14        | 0.466434        |
| Paraoxonase 3                                             | Pon3     | -1.09        | 0.625268        | 1.20         | 0.460669        | 1.13  | 0.610812 | -1.11       | 0.521395        |
| Stannin                                                   | Snn      | 1.25         | 0.408685        | -1.36        | 0.515546        | -1.07 | 0.690253 | -1.09       | 0.379438        |
| Steroid 5 alpha-reductase 1                               | Srd5a1   | 1.10         | 0.673761        | -1.70        | 0.016144        | -1.95 | 0.068375 | -1.04       | 0.744642        |
| Steroid 5 alpha-reductase 2                               | Srd5a2   | 1.22         | 0.355870        | 1.67         | 0.390400        | -1.15 | 0.728459 | -1.07       | 0.721747        |
| Actin, beta                                               | Actb     | 1.03         | 0.689732        | -1.12        | 0.422033        | -1.15 | 0.316985 | 1.07        | 0.549894        |
| Beta-2 microglobulin                                      | B2m      | -1.15        | 0.285273        | -1.20        | 0.172252        | -1.05 | 0.638436 | 1.07        | 0.424956        |
| Glyceraldehyde-3-phosphate dehydrogenase                  | Gapdh    | 1.15         | 0.162047        | <b>1.62</b>  | <b>0.009275</b> | 1.40  | 0.067970 | 1.10        | 0.399540        |
| Glucuronidase, beta                                       | Gusb     | -1.02        | 0.918994        | -1.30        | 0.148018        | -1.23 | 0.163243 | -1.07       | 0.596780        |
| Heat shock protein 90 alpha (cytosolic), class B member 1 | Hsp90ab1 | -1.01        | 0.822693        | 1.07         | 0.276644        | 1.07  | 0.151802 | -1.17       | 0.271760        |
